# Supplementary material for: Memantine Protects against Paclitaxel-Induced Cognitive Impairment through Modulation of Neurogenesis and Inflammation in Mice
Source: MDPI journal article supplement (doi:10.3390/cancers13164177), 2021-08-19
Supplement: s1 [file s1]

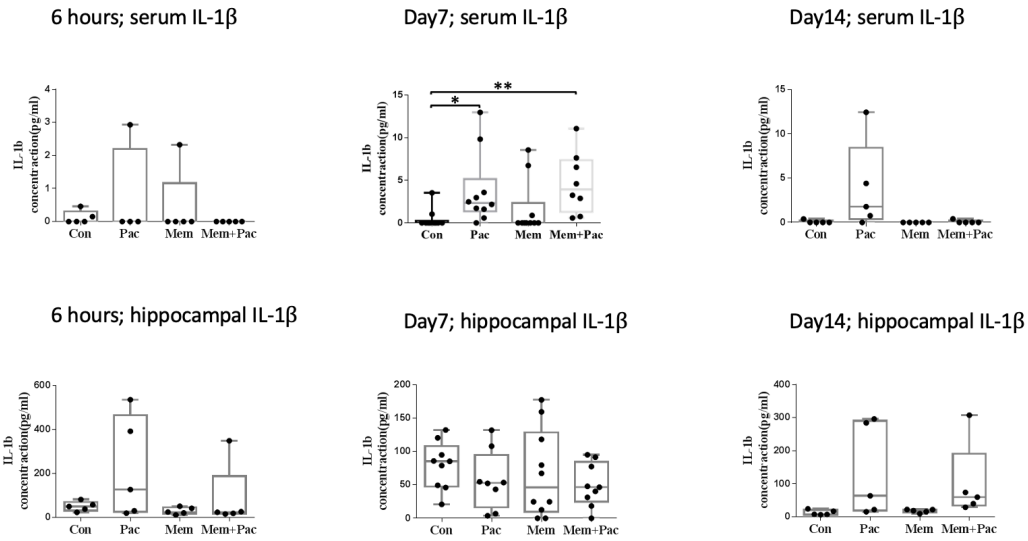

Supplementary Figure 1. Pretreatment regimen (Experiment 2). The serum expression of *IL-1 $\beta$*  was increased in the paclitaxel group and memantine + paclitaxel group on Day 7. However, the data was all comparable between groups in the hippocampal tissue at 6 hours, Day 7 and Day 14.

\* P<0.05; \*\* P<0.01; \*\*\* p<0.001; \*\*\*\* P<0.0001; N= 5-10 in each group

Day14; serum IL-1 $\beta$

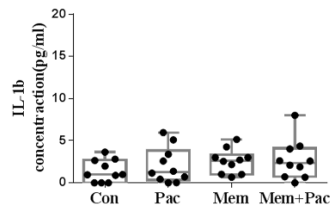

Day14; hippocampal IL-1 $\beta$

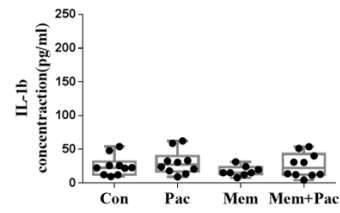

Supplementary figure 2. Cotreatment regimen (Experiment 3). The serum and hippocampal expression of *IL-1 $\beta$*  was comparable between groups on Day 14. N= 10 in each group
